# Supplementary material for: YTHDC1-mediated VPS25 regulates cell cycle by targeting JAK-STAT signaling in human glioma cells
Source: PubMed Central journal article supplement (PMC8642909; doi:10.1186/s12935-021-02304-0), 2021-12-04

Figure S6

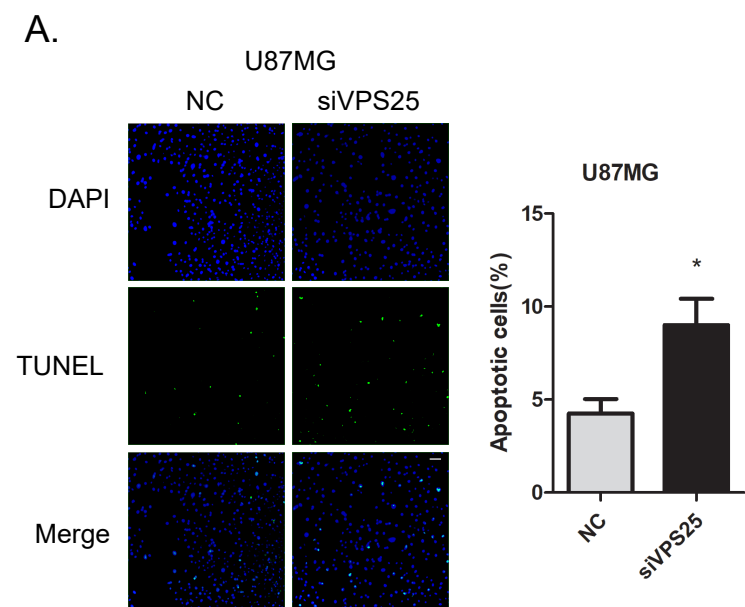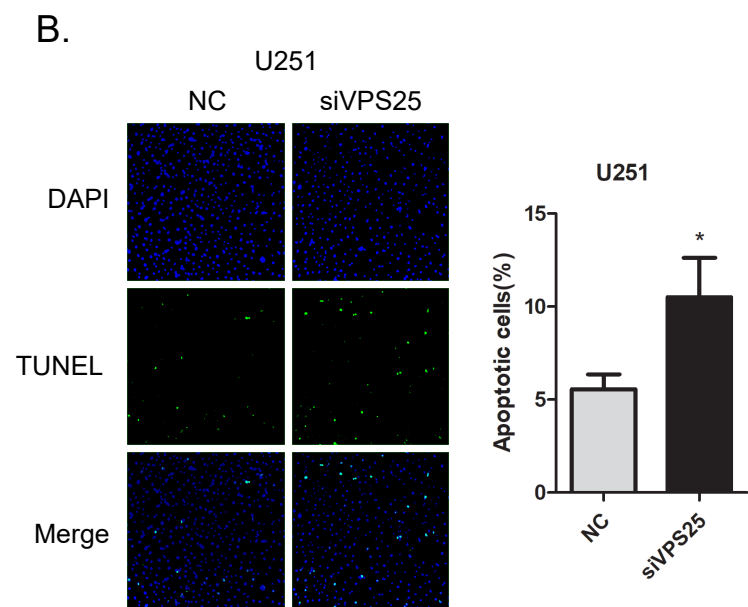

Supplement: 12935_2021_2304_MOESM6_ESM.pdf [file 12935_2021_2304_MOESM6_ESM.pdf]
